1  
2  
3  
4  
5  
6  
7  
8  
9  
10  
11  
12  
13  
14  
15  
16  
17  
18  
19  
20  
21  
22  
23

***Differential pulmonary immunopathologic response of domestic sheep  
(Ovis aries) and bighorn sheep (Ovis canadensis) to Mycoplasma  
ovipneumoniae infection: a retrospective study***

**Short title:** Pulmonary immunopathology of *Mycoplasma ovipneumoniae* infection in domestic  
and bighorn sheep

Paige C. Grossman<sup>1</sup>, David A. Schneider<sup>1,2</sup>, Donald P. Knowles<sup>1,2</sup>, Margaret A. Highland<sup>1,2\*</sup>

<sup>1</sup>Department of Veterinary Microbiology and Pathology, College of Veterinary Medicine,  
Washington State University, Pullman, Washington, United States of America

<sup>2</sup>Animal Disease Research Unit, Agricultural Research Service, United States Department of  
Agriculture, Pullman, Washington, United States of America

\*Corresponding author

[Maggie.Highland@ars.usda.gov](mailto:Maggie.Highland@ars.usda.gov) (MAH)

## 24 **Abstract**

25 *Mycoplasma ovipneumoniae* is a respiratory pathogen that can impact domestic sheep  
26 (*Ovis aries*; DS) and bighorn sheep (*Ovis canadensis*; BHS). Experimental and field data have  
27 indicated BHS are more susceptible than DS to developing polymicrobial pneumonia associated  
28 with *Mycoplasma ovipneumoniae* infection. We hypothesized that DS and BHS have a  
29 differential immunopathologic pulmonary response to *M. ovipneumoniae* infection. A  
30 retrospective study was performed using formalin-fixed, paraffin-embedded (FFPE) lung tissue  
31 from DS and BHS without and with *M. ovipneumoniae* detected in the lung tissue (n=8 per  
32 group). While each *M. ovipneumoniae* positive lung sample had microscopic changes typical of  
33 infection, including hyperplasia of intrapulmonary bronchus-associated lymphoid tissue (BALT)  
34 and respiratory epithelium, DS exhibited a more robust and well-organized BALT formation as  
35 compared to BHS. Immunohistochemistry was performed with antibodies reactive in FFPE  
36 tissues and specific for leukocyte and cytokine markers: T cell marker CD3, B cell markers  
37 CD20 and CD79a, macrophage markers CD163 and Iba1, and cytokine IL-17. Digital analysis  
38 was used to quantitate chromogen deposition in regions of interest (ROIs), including alveolar and  
39 bronchiolar areas, and bronchiolar subregions (epithelium and BALT). Main effects and  
40 interaction of species and infection status were analyzed by beta regression and Bonferroni  
41 corrections were performed on pairwise comparisons ( $P_{Bon} < 0.05$  significance). Significant  
42 species differences were identified for bronchiolar CD3 ( $P_{Bon} = 0.0023$ ) and CD163  
43 ( $P_{Bon} = 0.0224$ ), alveolar CD163 ( $P_{Bon} = 0.0057$ ), and for IL-17 in each of the ROIs (alveolar:  
44  $P_{Bon} = 0.0009$ ; BALT:  $P_{Bon} = 0.0083$ ; epithelium:  $P_{Bon} = 0.0007$ ). Infected BHS had a higher  
45 abundance of bronchiolar CD3 ( $P_{Bon} = 0.0005$ ) and CD163 ( $P_{Bon} = 0.0162$ ), and alveolar CD163  
46 ( $P_{Bon} = 0.0073$ ). While IL-17 significantly increased with infection in BHS BALT ( $P_{Bon} = 0.0179$ )

47 and alveolar (0.0006) ROIs, abundance in DS showed an insignificant decrease in these ROIs  
48 and a significant decrease in epithelial abundance ( $P_{Bon}=0.0019$ ). These findings support the  
49 hypothesis that DS and BHS have a differential immunopathologic response to *M.*  
50 *ovipneumoniae* infection.

51

## 52 **Introduction**

53 *Mycoplasma ovipneumoniae* is a recognized agent associated with respiratory disease in  
54 members of the subfamilies Caprinae (sheep, goats, muskox) and Capreolinae (deer family  
55 members) [1-4]. Although clinically healthy domestic sheep (*Ovis aries*; DS) and bighorn sheep  
56 (*Ovis canadensis*; BHS) of both species can carry *M. ovipneumoniae*, anecdotal field reports and  
57 captive interspecies commingling and infection experiments provide evidence that BHS are more  
58 susceptible to *M. ovipneumoniae* associated pneumonia than are DS [5-7]. *M. ovipneumoniae*  
59 infection in DS primarily affects lambs, causing chronic respiratory disease, and a few reports  
60 describe infection in association with decreased growth [8, 9]. *M. ovipneumoniae* has been  
61 implicated as one of the bacterial pathogens associated with the complex and population-limiting  
62 phenomenon of epizootic pneumonia in BHS [5, 10, 11]. In order to mitigate interspecies  
63 transmission of respiratory pathogens, current policy decisions have opted for absolute  
64 separation of these two ovine species. Increasing restrictions on DS grazing on public land  
65 allotments and social pressures placed on private landowners has resulted in economic hardship  
66 and social upset. In order to formulate alternative mitigation strategies, mechanisms underlying  
67 the interspecies susceptibility differences to respiratory pathogens must be understood. Filling  
68 the current knowledge gap of the immunopathology associated with *M. ovipneumoniae*

69 infections in DS and BHS will thus not only benefit animal health, but is also of socioeconomic  
70 and ecologic importance.

71 *M. ovipneumoniae* can serve as a primary pathogen, increasing the host's susceptibility to  
72 other bacteria by adhering to respiratory epithelium and impairing cilia function which is  
73 necessary for mucociliary clearance [12-15]. Additionally, *M. ovipneumoniae* is also reported to  
74 adhere to the surface of macrophages, impairing phagocytosis of *M. ovipneumoniae* and  
75 potentially other bacteria that may be present [16, 17]. Altered immune functions such as these  
76 can increase host susceptibility to secondary pulmonary infections by other opportunistic  
77 pathogens residing in the upper respiratory tract. Such opportunistic pathogens, often reported in  
78 *M. ovipneumoniae* associated polymicrobial pneumonia, include: *Mannheimia haemolytica*,  
79 *Bibersteinia trehalosi*, *Pasteurella multocida*, *Trueperella pyogenes*, and *Fusobacterium*  
80 *necrophorum* [1, 18].

81 Histopathologic findings of *M. ovipneumoniae* infection in both DS and BHS include  
82 hyperplasia of intrapulmonary bronchus-associated lymphoid tissue (BALT) and respiratory  
83 epithelium, and mononuclear cell infiltrates surrounding (“cuffing”) bronchioles and within  
84 alveolar septa [2]. The immune response, including the cellular composition of the BALT  
85 hyperplasia and inflammatory infiltrates, to *M. ovipneumoniae* infection has yet to be  
86 characterized for DS and BHS. In other respiratory-associated *Mycoplasma* spp. infections, such  
87 as *Mycoplasma pulmonis* in mice and *Mycoplasma pneumoniae* in humans, severity of disease is  
88 reportedly dependent on the type of T helper immune response mounted by the host. For  
89 example, in both humans and mice, a Th1 (cell-mediated) response resulted in better  
90 management of infection, whereas a Th2 (antibody) response resulted in heightened pathology  
91 [19, 20]. Additionally, inhibition of the Th17 response in an IL-17 receptor knock-out mouse

92 model resulted in higher bacterial load as compared to wild-type mice infected with *M. pulmonis*  
93 [20]. This led to the hypothesis that the reported interspecies susceptibility difference to *M.*  
94 *ovipneumoniae* associated polymicrobial pneumonia reported in DS and BHS is associated with  
95 a differential immunopathologic pulmonary response to *M. ovipneumoniae* infection. Therefore,  
96 the objective of this retrospective study was to qualitatively characterize and quantitatively  
97 compare the pulmonary immune responses of DS and BHS naturally infected with *M.*  
98 *ovipneumoniae*.

99

## 100 **Materials and Methods**

### 101 **Lung tissue specimens**

102 DS lung tissue was collected at University of Idaho Vandal Meats (Moscow, ID, USA)  
103 from lambs (estimated ages 7-12 months old) brought to slaughter between October 2016 and  
104 January 2018. DS lungs were grossly evaluated, the right cranial lobe removed, sterile swab  
105 samples collected from secondary bronchi, and a representative tissue sample from each animal  
106 was fixed in 10% neutral buffered formalin for 24 hours and a second sample was frozen fresh at  
107 -20°C.

108 BHS lung tissue sections (H&E and unstained sections for immunohistochemistry (IHC))  
109 used in this study were attained from the Washington Animal Disease Diagnostic Laboratory  
110 (Pullman, WA, USA; WADDL), with permission granted by the submitting wildlife agency.  
111 BHS lung tissue sections were from archived formalin-fixed paraffin-embedded (FFPE) tissues  
112 collected from specimens submitted between November 2012 and February 2015 to the WADDL  
113 for gross, histopathologic, and bacteriologic analyses from animals (adults and lambs) that were  
114 either hunter harvested or culled for management purposes.

115 This retrospective study was carried out using lung tissues that were made available by  
116 opportunistic collection from sheep that were not maintained for research purposes and that died  
117 by means unrelated to this study. Thus, ethical approval for the use of animals in this study was  
118 not required.

119

## 120 **Histologic and microbial assessment of lung tissue**

121 Fixed DS tissues were paraffin embedded, and 5  $\mu$ m thick sections of both DS and BHS  
122 FFPE lung tissue were H&E stained at the WADDL. Stained slides from DS and BHS lungs  
123 were evaluated by light microscopy and the specimen was included in the infected (positive,  
124 POS) group if changes consistent with *M. ovipneumoniae* infection (BALT and bronchiolar  
125 epithelial hyperplasia) were present (Fig 1B), and *M. ovipneumoniae* was detected in the lung.  
126 To determine the *M. ovipneumoniae* infection status of each DS, DNA was extracted from  
127 bronchial swabs, and PCR and sequencing were performed, as previously described [3]. The *M.*  
128 *ovipneumoniae* infection status of each BHS was determined by real-time PCR performed at the  
129 WADDL at the time of specimen submission. Specimens were excluded from the study if  
130 histopathologic evaluation identified bronchopneumonia, indicative of secondary bacterial  
131 infection (Fig 1C). Eight sheep of each species that met the POS group inclusion criteria were  
132 selected for study. An additional 8 sheep of each species were selected for the “not detected”  
133 (ND) group based on the absence of *M. ovipneumoniae* DNA detection and the absence of  
134 histologic changes of infection or other abnormalities (Fig 1A). Three of the BHS specimens  
135 were from lambs (approximately 5-9 month old), 2 of which were placed in the “infected” group,  
136 and 13 were from adults. Light microscopic analysis was performed on H&E stained slides by a  
137 pathologist (MAH) to qualitatively characterize histopathologic changes. Aerobic bacterial

138 culture on fresh (BHS) or fresh frozen (DS) lung specimens was performed at the WADDL to  
139 further assess for bacterial co-infections in each of the 32 animals included in this study.

140

141 **Fig 1. Histopathologic criteria for specimen selection.** (A) Histologically normal lung selected  
142 for the *Mycoplasma ovipneumoniae* “not detected” (ND) group. (B) Lung section with  
143 histopathologic change consistent with *Mycoplasma ovipneumoniae* infection including  
144 bronchial associated lymphoid tissue (BALT) hyperplasia, epithelial hyperplasia, peribronchiolar  
145 lymphoid cuffing, and atelectasis, selected for infected group, selected for the *M. ovipneumoniae*  
146 positive (POS) group. (C) Lung section excluded from study showing histopathologic change  
147 consistent with bronchopneumonia (suspect secondary bacterial infection), including suppurative  
148 exudate in a bronchiole and alveolar inflammatory infiltrates. Representative domestic sheep  
149 lung tissue; H&E stain; scale bar = 250  $\mu$ m.

150

## 151 **Immunohistochemistry**

### 152 **Protocol**

153 FFPE tissue sections (3  $\mu$ m) were placed on charged glass slides and baked at 56°C  
154 overnight before staining. Immunohistochemistry was carried out in a Ventana Discovery XT  
155 automated slide stainer using Cell Conditioner 1 (basic conditioner on medium setting) for  
156 antigen retrieval (eleven 4 minute incubations), DISCOVERY Antibody Block (4 minute  
157 incubation), DISCOVERY Universal Secondary Antibody cocktail (1 hour incubation), the  
158 DISCOVERY RedMap chromogen kit, and hematoxylin (4 minute incubation) and Bluing  
159 Reagent (4 minute incubation) counterstain (Roche, Ventana Medical Systems, Inc, Tucson, AZ,  
160 USA). Following antigen retrieval and preceding the antibody block step, Dako Dual

161 Endogenous Enzyme Block was used to abolish endogenous enzyme activity (12 minute  
162 incubation; Agilent, Santa Clara, CA, USA). Each primary antibody was loaded onto the slide  
163 following the blocking step and incubated for 2 hours. After the staining was complete, slides  
164 were dipped 50 times in Dawn® dishwashing liquid diluted in water, 10 times in tap water, 3  
165 times in double distilled water, 30 times in 4 changes of 100% ethanol, and 50 times in 3 changes  
166 xylenes before cover-slipping.

### 167 **Leukocyte and cytokine immunomarkers**

168 Thirty-three antibodies were screened for use in this study (S1 Table). Antibodies that  
169 could be optimized (reactive in each species with specific staining and little to no background)  
170 included a T cell marker (CD3), B cell markers (CD20 and CD79a), macrophage markers  
171 (CD163 and Iba1), and one antibody for cytokine IL-17 (Table 1). Antibodies that could not be  
172 optimized were attempted at several different concentrations, with both basic (Cell Conditioner  
173 1) and mildly acidic (Cell Conditioner 2) antigen retrieval methods (Roche, Ventana Medical  
174 Systems, Inc, Tucson, AZ, USA). While anti-CD45RO worked in DS tissue, it could not be  
175 optimized for use in the BHS tissues.

176

177 **Table 1. Antibodies optimized for immunohistochemically labeling formalin-fixed, paraffin**  
178 **embedded domestic and bighorn sheep tissue.**

| Antigen | [Antibody] (µg/mL) |               | Producer / Catalog # | Host / Isotype          |
|---------|--------------------|---------------|----------------------|-------------------------|
|         | Domestic sheep     | Bighorn sheep |                      |                         |
| CD3     | 1.25 µg/mL         | 5 µg/mL       | Dako/A0452           | Rabbit/Polyclonal       |
| CD20    | 100 µg/mL          | 100 µg/mL     | Biocare/ACR3004B     | Rabbit/Polyclonal       |
| CD79a   | 0.86 µg/mL         | 0.86 µg/mL    | Novus Bio/NB600-1058 | Rabbit/Polyclonal IgG   |
| CD163   | 2 µg/mL            | 2 µg/mL       | Bio-Rad/MCA1853      | Mouse / Monoclonal IgG1 |
| Iba-1   | 0.25 µg/mL         | 0.25 µg/mL    | Wako/019-19741       | Rabbit/Polyclonal       |
| IL-17   | 10 µg/mL           | 10 µg/mL      | Abcam/ab79056        | Rabbit/Polyclonal       |



179

## 180 **Control antibodies**

181           Appropriate isotype negative control antibodies were used in each IHC run on  
182 representative BHS and DS tissue sections at the same concentration as the specific primary  
183 antibody. Non-immunized rabbit serum (X0903; Agilent, Santa Clara, CA, USA) was used as the  
184 negative control for the polyclonal antibodies and irrelevant epitope monoclonal IgG1, IgG2a,  
185 and IgG2b were used as the monoclonal negative controls (ab81032, ab18414, ab18457; Abcam,  
186 Eugene, OR, USA). Prior to use, total IgG was purified from the polyclonal negative control  
187 rabbit serum using Nab™ Protein A Plus Spin Kit, followed by dialysis against PBS containing  
188 0.02% sodium azide using a Slide-A-Lyzer™ 3.5K MWCO Dialysis Cassette, following the  
189 manufacturer's instructions (Thermo Scientific, Waltham, MA, USA). Protein concentrations of  
190 the non-immunized rabbit serum (polyclonal control) and the purified total IgG (polyclonal IgG  
191 control) were determined using the Pierce™ BCA protein assay kit, following the manufacturer's  
192 instructions (Thermo Scientific, Waltham, MA, USA).

193

## 194 **Analysis**

### 195 **Tissue imaging**

196           Immunolabeled slides were sent to the University of Washington Histology Imaging Core  
197 (Seattle, WA, USA) and scanned with a Hamamatsu NanoZoomer S360 (Hamamatsu Photonics,  
198 Bridgewater NJ, USA). Images were imported into Visiopharm software (Visiopharm,  
199 Hoersholm, Denmark) for quantitative analysis using previously described Visiopharm Image  
200 Analysis module settings [21]. Regions of interest (ROIs) were manually selected on each slide

201 (S1 Fig). For five of the immunomarker antibodies (anti-CD3, anti-CD20, anti-CD79a, anti-  
202 CD163, and anti-Iba-1), the ROI included bronchi/bronchioles and the surrounding tissue  
203 including associated immune tissue (BALT, immune cell “cuffing”), but excluded bronchial  
204 cartilage and surrounding alveoli; these regions are referred to simply as “bronchiolar” ROIs  
205 (Image A in S1 Fig). Since IL-17 is produced by both immune cells and respiratory epithelial  
206 cells [22], the bronchiolar ROIs were each subdivided into 2 ROIs for quantifying IL-17  
207 immunolabeling: bronchiolar epithelium and bronchiolar ROI’s excluding the epithelium,  
208 referred to as “epithelium” and “BALT”, respectively. Macrophage immunomarkers (CD163 and  
209 Iba1) and the IL-17 cytokine marker were also evaluated in alveoli and alveolar walls, this  
210 “alveolar” ROI was identified by selecting the whole lung tissue section and excluding  
211 bronchiolar ROIs (Image B in S1 Fig).

## 212 **Statistical analysis**

213 Leukocyte marker and cytokine abundances were quantitatively assessed as the ratio of  
214 immunolabeled area ( $\mu\text{m}^2$ ) to the total tissue area ( $\mu\text{m}^2$ ) of a given ROI. Non-specific chromogen  
215 deposition for each of the isotype negative control slides was similarly assessed, the ratio values  
216 of which were deducted from each test slide to provide the final area ( $\mu\text{m}^2$ ) of immunospecific  
217 chromogen deposition. Background correction resulted in bronchiolar chromogen ratios slightly  
218 less than zero for anti-CD20 (7 of 8 ND BHS) and anti-CD79a (2 of 8 ND and 1 of 8 POS BHS).  
219 Given that visual inspection of these slides confirmed minimal or no chromogen deposition other  
220 than background, a small constant was added to rescale all samples within each of these  
221 immunomarker groups, such that the greatest negative ratio values were equal to  $1 \times 10^{-7}$ . The  
222 main effects and interaction of species (DS, BHS) and infection status (ND, POS) on the ratio  
223 measure of immunospecific chromogen deposition (a proportional response bounded by zero and

224 one) was analyzed by beta regression (PROC GLIMMIX, logit link function; SAS version 9.4,  
225 SAS Institute Inc., Cary, NC, USA). The main effects and interaction of species and infection  
226 status on the mean area of epithelium ROI and mean area of BALT ROI per airway (total area of  
227 epithelium ROI or BALT ROI divided by the total number of bronchi and bronchioles), was also  
228 analyzed by beta regression (PROC GLIMMIX, identity link function; SAS version 9.4, SAS  
229 Institute Inc., Cary, NC, USA). A significant interaction term was parsed for all pairwise  
230 comparisons using the method of Bonferroni ( $P_{Bon}$ ). Significance was attributed to effects with  
231 P-values  $< 0.05$ . “Outlier” data were identified as values meeting two criteria: (1) the value was  
232 identified as a far outlier (i.e., values  $> 3x$  the interquartile range; PROC BOXPLOT, SAS  
233 version 9.4, SAS Institute Inc., Cary, NC, USA); and (2) if any of the absolute values of the  
234 Studentized residuals associated with a far outlier were greater than 3. Outliers so identified were  
235 excluded from the final analyses. Of note, outlier exclusion improved the apparent fit of the beta  
236 regression model but did not change the significance of main, interaction, or post-hoc effects of  
237 interest in any analysis. Although excluded from analysis, data identified as outliers are depicted  
238 as “x” within box plot presentations.

239

## 240 **Results**

241 Qualitative assessment of H&E stained lung tissue sections determined that the samples  
242 from *M. ovipneumoniae* POS DS had a more densely cellular and organized BALT hyperplasia  
243 with secondary follicle formation as compared to the samples from POS BHS. Similarly, the  
244 samples from the ND DS had more centers of BALT observed than ND BHS. Epithelial  
245 hyperplasia was observed in both POS BHS and POS DS. Overall, notable differences in these

246 observations were not noted between lamb and adult BHS lung tissue sections. Figure 2  
247 illustrates examples of the most prominent BALT identified in 4 animals from each of the study  
248 groups.

249

250 **Fig 2. Representative images of lung tissue from domestic sheep and bighorn sheep without**  
251 **and with *Mycoplasma ovipneumoniae* infection.** Light microscopic image examples of lung  
252 tissue from 8 domestic sheep (DS) and 8 bighorn sheep (BHS) in which *Mycoplasma*  
253 *ovipneumoniae* was not detected (ND) or detected (POS) in lung tissue. Images represent the  
254 most prominent areas of bronchus-associated lymphoid tissue (BALT) identified in animals  
255 within study. ND DS had more observed centers of BALT than ND BHS. Centers of BALT  
256 appeared densely cellular with secondary follicle formation in POS DS, as compared to the less  
257 organized and looser arrangement of the BALT observed in POS BHS samples. ND and POS  
258 BHS lambs are represented in column 1; all other BHS are adults. H&E stain; scale bar = 250  
259  $\mu\text{m}$ .

260

261 The results of digital quantification of BALT ROI and epithelial ROI areas are shown in  
262 Figure 3. Although there was no interaction between the effects of species and infection status,  
263 analysis supported the qualitative observation of BALT hyperplasia in POS animals, as infection  
264 was associated with a significantly larger overall mean area of BALT ROI per airway  
265 ( $P_{infection}=0.0016$ ). The estimate (mean and standard error) for the effect of infection status (POS  
266 vs ND) on the mean area ( $\text{mm}^2$ ) of BALT ROI per airway was  $0.6216 \pm 0.1769$ , representing a  
267 fold change of 1.862 (95% confidence limits = 1.295-2.677). The mean area of BALT ROI per  
268 airway was larger in BHS as compared to DS ( $P_{species}=0.0079$ ). The estimate for the effect of

269 species (BHS vs DS) was  $0.5064 \pm 0.1766$ , representing a fold change of  $1.659 \text{ mm}^2$  (95%  
270 confidence limits = 1.155-2.384). The qualitative observation of epithelial hyperplasia in POS  
271 samples was not detected by digital quantification and analysis, as the area of epithelial ROI per  
272 airway was not significantly associated with effect of infection status ( $P_{infection}=0.9244$ ), nor was  
273 it associated with either the effect of species ( $P_{species}=0.2306$ ) or the interaction of these main  
274 effects ( $P_{interaction}=0.0731$ ).

275

276 **Fig 3. Quantitative analysis of bronchus-associated lymphoid tissue and**  
277 **bronchial/bronchiolar epithelium within lung tissue from domestic sheep and bighorn**  
278 **sheep without and with *Mycoplasma ovipneumoniae* infection.** The Y-axes represent the area  
279 ( $\text{mm}^2$ ) of bronchial-associated lymphoid tissue (BALT) and bronchiole/bronchiolar epithelium,  
280 as indicated above each box plot. Infection status is represented on the X-axes by (-) and (+),  
281 indicating *Mycoplasma ovipneumoniae* was not detected or detected, respectively, in the  
282 domestic sheep (DS) and bighorn sheep (BHS). Box plot construction: box, interquartile range  
283 (IQR); open diamond, mean; horizontal line, median; vertical whiskers, data extending up to  
284  $1.5 \times \text{IQR}$ ; open circle, data  $> 1.5 \times \text{IQR}$ ; x, data identified as extreme values and excluded from  
285 formal analyses. Inset text: P-values for the main effects (species and infection status) and  
286 interaction term. The two outliers (“x”) are adults.

287

288 Analysis of the proportion of the area of chromogen deposition to the area of the ROI  
289 revealed significant interactions between the effects of species and infection status in the  
290 bronchiolar ROI for CD3 ( $P=0.0023$ ) and CD163 ( $P=0.0224$ ), and in the alveolar ROI for  
291 CD163 ( $P=0.0057$ ). Infection was associated with significantly higher bronchiolar chromogen

292 deposition for CD3 in BHS (~7.1-fold;  $P_{Bon}<0.0001$ ) but a significant difference was not  
293 detected between ND and POS DS ( $P_{Bon}=0.1989$ ). Similarly, infection was associated with  
294 significantly higher bronchiolar CD163 chromogen deposition in BHS (~4.0-fold;  $P_{Bon}=0.0064$ ),  
295 but a significant difference was not detected between ND and POS DS ( $P_{Bon}=1.0000$ ). Although  
296 the interaction term for the proportion of bronchiolar CD20 chromogen deposition was not  
297 considered significant ( $P_{interaction}<0.0527$ ), the overall proportion was significantly less in BHS  
298 than in DS ( $P_{species}<0.0001$ ) and significantly higher in association with infection in both species  
299 ( $P_{infection}<0.0001$ ). The proportion of bronchiolar CD79a chromogen deposition was higher with  
300 infection ( $P_{infection}=0.0127$ ) but significant effects of species were not detected ( $P_{species}=0.1827$ ;  
301  $P_{interaction}=0.6063$ ). Bronchiolar Iba1 chromogen deposition was not associated with significant  
302 main effects of species ( $P_{species}=0.0871$ ) or infection status ( $P_{infection}=0.5642$ ), nor with significant  
303 interaction of these terms ( $P_{interaction}=0.4691$ ).

304         Within the alveolar ROI, a significant interaction of species and infection status was  
305 detected for CD163 ( $P_{interaction}=0.0057$ ). Infection was associated with higher alveolar  
306 chromogen deposition for CD163 in BHS (~4.3-fold;  $P_{Bon}=0.0062$ ) but no difference was  
307 detected between ND and POS DS ( $P_{Bon}=1.0000$ ). Alveolar Iba1 chromogen deposition was not  
308 associated with significant main effects of species ( $P_{species}=0.2336$ ) or infection status  
309 ( $P_{infection}=0.9897$ ), nor with significant interaction of these terms ( $P_{interaction}=0.9426$ ).

310         For IL-17, significant interactions of species and infection status were detected in each of  
311 three ROI (BALT,  $P_{interaction}=0.0083$ ; bronchiolar epithelium,  $P_{interaction}=0.0007$ ; alveolar,  
312  $P_{interaction}=0.0009$ ). Within the BALT ROI, IL-17 chromogen deposition was significantly higher  
313 in association with infection in BHS (~2.2-fold,  $P_{Bon}=0.0179$ ) but no difference was detected  
314 between ND and POS DS ( $P_{Bon}=1.0000$ ). Similarly, alveolar IL-17 chromogen deposition

315 immunolabeling was significantly higher in association with infection in BHS (~4.3-fold,  
316  $P_{Bon}=0.0006$ ) but no significant difference was detected between ND and POS DS  
317 ( $P_{Bon}=1.0000$ ). In contrast, infection was associated with significantly lower IL-17 chromogen  
318 deposition within bronchiolar epithelium in DS (~2.6 fold,  $P_{Bon}=0.0019$ ), but no difference was  
319 detected between ND and POS BHS ( $P_{Bon}=1.0000$ ).

320         Representative images of immunolabeled and negative isotype control sections are shown  
321 in Figure 4. The results of digital quantification for all immune cell markers within the  
322 bronchiolar ROI (Fig 5A) and for macrophage markers within the alveolar ROI (Fig 5B) are  
323 summarized as box-and-whiskers plots. Quantification for the cytokine, IL-17, immunomarker  
324 specifically within the BALT, epithelium, and alveolar ROIs is also summarized as box-and-  
325 whiskers plots (Fig 6). Outliers, depicted by “x” in Figures 4 and 5, identified for the BHS are  
326 adult animals, except for the POS BHS CD20 outlier which is a lamb. The intraspecies and  
327 interspecies fold changes (odds ratios) in immunospecific chromogen deposition associated with  
328 infection status are provided in Table 2.

329

330 **Fig 4. Representative immunolabeled lung tissue sections from domestic sheep and bighorn**  
331 **sheep without and with *Mycoplasma ovipneumoniae* infection.** Light microscopic images of  
332 immunolabeled (top 4 rows) and negative control (bottom 2 rows) lung tissue, including  
333 bronchi/bronchioles and surrounding tissue, from domestic sheep (DS; rows 1, 3, 5) and bighorn  
334 sheep (BHS; rows 2, 4, 6) that had *Mycoplasma ovipneumoniae* either not detected (ND; top 2  
335 rows) or detected (POS; middle 2 rows) in lung tissue. Red chromogen deposits represent  
336 detection of leukocyte markers and a cytokine, as indicated by column headings. Counter stain:  
337 hematoxylin and Bluing Reagent; scale bar = 250  $\mu\text{m}$ .

338

339 **Fig 5. Quantitative analysis of leukocyte markers within lung tissue from domestic sheep**

340 **and bighorn sheep without and with *Mycoplasma ovipneumoniae* infection.** The Y-axes

341 represent ratio of the area of immunospecific chromogen to total bronchial/bronchiolar tissue

342 (“bronchiolar”) area (A), and to total alveolar area (B). Areas of chromogen deposition represent

343 detection of leukocyte markers, as indicated above each box plot. Infection status is represented

344 on the X-axes by (-) and (+), indicating *Mycoplasma ovipneumoniae* was not detected or

345 detected, respectively, in the domestic sheep (DS) and bighorn sheep (BHS). Box plot

346 construction: box, interquartile range (IQR); open diamond, mean; horizontal line, median;

347 vertical whiskers, data extending up to 1.5x IQR; open circle, data > 1.5x IQR; x, data identified

348 as extreme values and excluded from formal analyses. Statistical bars: significant difference

349 between infection statuses within the indicated species (bar with drop lines) or between species

350 within an infection status (bar without drop lines). Inset text: statistical significance of the main

351 effects when the interaction term was insignificant. All data used for analysis are provided for

352 review (S2 Table). The (-) BHS outliers include 1 lamb (CD20) and 1 adult (CD163).

353

354 **Fig 6. Quantitative analysis of cytokine IL-17 within lung tissue from domestic sheep and**

355 **bighorn sheep without and with *Mycoplasma ovipneumoniae* infection.** The Y-axes represent

356 ratio of the area of IL-17 immunospecific chromogen deposition to the region of interest (ROI)

357 as indicated above each boxplot. Infection status is represented on the X-axes by (-) and (+),

358 indicating *Mycoplasma ovipneumoniae* was not detected or detected, respectively, in the

359 domestic sheep (DS) and bighorn sheep (BHS). Box plot construction: box, interquartile range

360 (IQR); open diamond, mean; horizontal line, median; vertical whiskers, data extending up to



361 1.5x IQR; open circle, data > 1.5x IQR; x, data identified as an extreme value and excluded from  
362 formal analyses. Statistical bars: significant difference between infection statuses within the  
363 indicated species (bar with drop lines) or between species within an infection status (bar without  
364 drop lines). Interaction is significant ( $P_{interaction} < 0.05$ ) for each ROI. All data used for analysis are  
365 provided for review (S2 Table). The single BHS outlier is an adult.

366 **Table 2. Intraspecies and interspecies fold change in chromogen deposition in domestic sheep and bighorn sheep without and**  
 367 **with *Mycoplasma ovipneumoniae* detected in lung tissue.**

| Antigen | Region of Interest | Intraspecies POS:ND<br>Fold Change (CL <sub>Bon</sub> )<br><i>P</i> <sub>Bon</sub> |                                 | Interspecies BHS:DS<br>Fold Change (CL <sub>Bon</sub> )<br><i>P</i> <sub>Bon</sub> |                                 |
|---------|--------------------|------------------------------------------------------------------------------------|---------------------------------|------------------------------------------------------------------------------------|---------------------------------|
|         |                    | BHS                                                                                | DS                              | ND                                                                                 | POS                             |
| CD3     | bronchiolar        | 7.061 (3.165, 15.752)<br><0.0001                                                   | 1.880 (0.845, 4.184)<br>0.1989  | 0.701 (0.272, 1.807)<br>1.0000                                                     | 2.633 (1.450, 4.782)<br>0.0005  |
| CD20    | bronchiolar        | 11.990 (3.378, 42.551)<br><0.0001                                                  | 4.316 (1.969, 9.463)<br><0.0001 | 0.122 (0.034, 0.433)<br>0.0004                                                     | 0.339 (0.162, 0.708)<br>0.0017  |
| CD79a   | bronchiolar        | 2.854 (0.755, 10.792)<br>0.1990                                                    | 2.043 (0.563, 7.418)<br>0.7578  | 0.544 (0.141, 2.107)<br>1.0000                                                     | 0.760 (0.222, 2.608)<br>1.0000  |
| CD163   | bronchiolar        | 3.970 (1.361, 11.584)<br>0.0064                                                    | 0.987 (0.287, 3.395)<br>1.0000  | 0.888 (0.266, 2.969)<br>1.0000                                                     | 3.572 (1.192, 10.703)<br>0.0162 |
|         | alveolar           | 4.325 (1.394, 13.420)<br>0.0062                                                    | 0.728 (0.211, 2.507)<br>1.0000  | 0.705 (0.204, 2.438)<br>1.0000                                                     | 4.186 (1.358, 12.900)<br>0.0073 |
| Iba1    | bronchiolar        | 1.377 (0.486, 3.902)<br>1.0000                                                     | 0.964 (0.390, 2.384)<br>1.0000  | 0.543 (0.199, 1.480)<br>0.5686                                                     | 0.775 (0.299, 2.009)<br>1.0000  |
|         | alveolar           | 0.980 (0.364, 2.638)<br>1.0000                                                     | 1.014 (0.410, 2.511)<br>1.0000  | 0.762 (0.295, 1.971)<br>1.0000                                                     | 0.737 (0.285, 1.907)<br>1.0000  |
| IL-17   | BALT               | 2.153 (1.102, 4.206)<br>0.0179                                                     | 0.858 (0.458, 1.609)<br>1.0000  | 0.576 (0.289, 1.151)<br>0.1895                                                     | 1.447 (0.791, 2.647)<br>0.5615  |
|         | alveolar           | 4.331 (1.733, 10.828)<br>0.0006                                                    | 0.868 (0.384, 1.965)<br>1.0000  | 0.414 (0.160, 1.072)<br>0.0820                                                     | 2.063 (0.959, 4.438)<br>0.0723  |
|         | epithelium         | 1.251 (0.702, 2.231)<br>1.0000                                                     | 0.378 (0.192, 0.741)<br>0.0019  | 0.832 (0.465, 1.487)<br>1.0000                                                     | 2.756 (1.407, 5.397)<br>0.0012  |

368 The proportion of chromogen deposition within each region of interest relative to *Mycoplasma ovipneumoniae* infection status

369 (infected (POS) versus not detected (ND) for domestic sheep (DS) and bighorn sheep (BHS). Changes of interest included intraspecies

370 comparisons (ND BHS compared to POS BHS; ND DS compared to POS DS) and interspecies comparisons (ND BHS compared to  
371 ND DS; POS BHS compared to POS DS). Odds ratios are reported as fold change and Bonferroni adjusted 95% confidence limits are  
372 reported parenthetically; Bonferroni adjusted P-values ( $P_{Bon}$ ) <0.05 are considered significant.

373

## 374 **Discussion**

375           The goal of this retrospective study was to test the hypothesis that there is a phenotypic  
376 interspecies difference in the pulmonary immune response exhibited by DS and BHS naturally  
377 infected with *M. ovipneumoniae*. Examining the response in naturally infected animals, living  
378 and managed as they otherwise exist, was a primary criterion of this project. This criterion was  
379 set based on the potential impact that captive environments can have on wild species, specifically  
380 alterations in immune responses secondary to stress or potential suboptimal nutrition.  
381 Additionally, this retrospective study design supports animal reduction in research, which  
382 supports the United States legislative mandate to incorporate the three Rs (reduction, refinement,  
383 and replacement) into research [23]. Since study design limited the available specimens for BHS  
384 to archived FFPE tissue, the opportunistically collected DS lung tissues were similarly fixed and  
385 processed. While formalin fixation followed by processing into paraffin blocks is an excellent  
386 method for maintaining tissue architecture for light microscopic examination, and is a common  
387 way to archive tissues, this processing can mask protein epitopes and thus limit antibodies for  
388 use in IHC. However, identifying antibodies for use in FFPE tissue is relevant and important, as  
389 already mentioned, many archived tissues are preserved in this manner and can serve as a  
390 valuable resource to researchers while reducing animal use in research.

391           Results of this study indicate that BHS respond to *M. ovipneumoniae* infection with a  
392 significantly more prominent T cell response as compared to DS. Multiple attempts were made  
393 to characterize the type(s) of T cells present in the bronchiolar ROIs (S1 Table) without success,  
394 likely due to the described limitations of using FFPE tissue. Regardless, the significantly higher  
395 chromogen deposition of T cell immunomarker CD3 in POS BHS, and B cell marker CD20 in

396 POS DS (Table 2) substantiates the qualitative observation that POS BHS had dispersed or  
397 loosely arranged BALT and little to no follicle formation as compared to the more densely  
398 cellular, secondary follicle containing BALT observed in POS DS.

399 While the abundance of the macrophage marker CD163 increased significantly with  
400 infection in BHS bronchiolar and alveolar ROIs, as compared to DS which exhibited no change  
401 with infection in either ROI, the pan-macrophage marker, Iba-1, remained similar with infection  
402 in both species. CD163+ macrophages are activated along the alternative (M2) pathway by both  
403 pro-inflammatory Th2 cytokines and anti-inflammatory (glucocorticoids) stimuli [24]. Further  
404 investigation is required to determine which of these activation pathways predominates with  
405 infection in BHS; however, this result may be situation dependent and difficult to repeat  
406 experimentally if activation was by the anti-inflammatory pathway, secondary to unrecognized  
407 environmental stressors.

408 Perhaps the most interesting results from this study were for cytokine IL-17. IL-17 is  
409 expressed by Th17 cells, as well as NK cells, and neutrophils, and has been reported in other  
410 species to be expressed within pulmonary epithelium [22, 25]. IL-17 is a secreted cytokine that  
411 binds pulmonary epithelial cells inducing mucin production and stimulates neutrophil  
412 recruitment to the site of infection [26]. In this study, IL-17 significantly increased with infection  
413 in BHS BALT and alveolar ROIs while remaining similar in these ROI's for DS. However, IL-  
414 17 significantly decreased with infection within the bronchial/bronchiolar epithelium in DS,  
415 while BHS had no detected change, remaining at an abundance similar to that of the uninfected  
416 DS. In murine studies, mice that were unable to produce an IL-17 response had depleted amounts  
417 of neutrophils and larger numbers of *M. pulmonis* present in the lung [20]. This suggests that IL-  
418 17 can contribute to an effective immune response to this pathogen through recruitment of

419 neutrophils, although exuberant recruitment of inflammatory cells, particularly neutrophils, to  
420 pulmonary tissue can cause host cell damage that outweighs the benefit. The abundance of IL-17  
421 in both uninfected DS and BHS and infected BHS pulmonary respiratory epithelium, in the  
422 absence of neutrophil influx, may indicate the IL-17 was produced locally but largely remained  
423 intracellular. IL-17 stimulated neutrophil recruitment may be of particular interest in BHS, as  
424 previous research supports higher neutrophil recruitment with pulmonary inflammation in BHS  
425 as compared to DS [27]. Additionally, BHS neutrophils have been shown to have heightened  
426 sensitivity to the cytotoxic effects of bacterial toxins, such as leukotoxin produce by *M.*  
427 *haemolytica* and *F. necrophorum* [18, 28, 29]. Given the importance of these leukotoxin  
428 producing bacteria in polymicrobial ovine pneumonia, exacerbation of neutrophil recruitment by  
429 IL-17 may in part explain the heightened morbidity and mortality described in BHS. In addition  
430 to IL-17 induced mucin production, experimental *M. pneumoniae* infection in mice has been  
431 shown to stimulate mucin production through toll-like receptor 2 [30]. Excess production of  
432 mucin in addition to mucociliary clearance impediment may act synergistically to enhance an  
433 environment favorable to colonization of bacteria that, under normal healthy lung conditions, are  
434 aspirated but then quickly cleared from the lungs.

435         Limitations and potential confounding factors to acknowledge in this study include the  
436 unknown time course of infection, pulmonary bacterial load in each animal, precise ages of the  
437 sheep, and precise site of sample collection for the BHS. Although the ages varied more in BHS,  
438 as compared to the DS, there was no indication that age impacted the study, as just 1 of the 5  
439 outlier BHS data points was from a lamb, and no consistent lamb versus adult BHS trends were  
440 noted in the raw data (S2 and S3 Tables). Although the collection of lung tissue between species  
441 was considered an uncontrolled aspect of this retrospective study and a more bronchi were

442 present in the DS samples, interspecies evaluation of the total number of airways, number of  
443 bronchioles, and total tissue area for the specimens used in this study were not significantly  
444 different (S2 Table). The larger number of bronchi in DS samples likely indicates specimens  
445 were collected closer to a primary bronchus than were the BHS tissues.

446         These data begin to define the immune responses found in the lungs of DS and BHS in  
447 the presence of *M. ovipneumoniae* infection. Especially interesting are the findings concerning  
448 comparative IL-17 levels. Critically, future work needs to address the interactions of  
449 environmental factors (*e.g.* stress, nutrition), host factors (*e.g.* genetics), and other potentially  
450 synergistic pathogens that may influence the immune response and induction of pneumonic  
451 disease associated with *M. ovipneumoniae* in DS and BHS.

452

## 453 **Acknowledgments**

454         We wish to thank Dr. Charles Frevert, Brian Johnson, and Megan Larmore at the  
455 University of Washington Histology and Imaging Core Laboratory for their assistance; with  
456 special thanks to Megan for her excellent guidance in whole slide scanning and quantitative  
457 analysis. We are grateful to Dr. William Davis with the Washington State Monoclonal Antibody  
458 Laboratory for providing multiple monoclonal antibodies tested for use in this study. We thank  
459 the employees at the University of Idaho Vandal meets for providing the means for domestic  
460 sheep sample collection. We also thank Lori Fuller for immunohistochemistry guidance and  
461 Nicholas Durfee for general laboratory assistance.

462

## 463 **References**

- 464 1. Besser TE, Highland MA, Baker K, Cassirer EF, Anderson NJ, Ramsey JM, et al. Causes of  
465 pneumonia epizootics among bighorn sheep, Western United States, 2008-2010. *Emerg Infect*  
466 *Dis.* 2012;18(3):406-14. doi: 10.3201/eid1803.111554.
- 467 2. Nicholas R, Ayling R, McAuliffe L. *Respiratory Diseases of Small Ruminants. Mycoplasma*  
468 *Diseases of Ruminants.* Cambridge, MA: CAB International; 2008. p. 169-98.
- 469 3. Highland MA, Herndon DR, Bender SC, Hansen L, Gerlach RF, Beckmen KB. *Mycoplasma*  
470 *ovipneumoniae* in wildlife species beyond subfamily Caprinae. *Emerg Infect Dis.*  
471 2018;24(12):2384-6. doi: 10.3201/eid2412.180632.
- 472 4. Rovani ER, Beckmen KB, Highland MA. *Mycoplasma ovipneumoniae* associated with  
473 polymicrobial pneumonia in a free-ranging yearling barren ground caribou (*Rangifer tarandus*  
474 *granti*) from Alaska, USA. *J Wildl Dis.* 2019. doi: 10.7589/2018-08-188.
- 475 5. Besser TE, Cassirer EF, Highland MA, Wolff P, Justice-Allen A, Mansfield K, et al. Bighorn  
476 sheep pneumonia: Sorting out the cause of a polymicrobial disease. *Preventive Veterinary*  
477 *Medicine.* 2013;108(2-3):85-93. doi: 10.1016/j.prevetmed.2012.11.018.
- 478 6. Besser TE, Cassirer EF, Yamada C, Potter KA, Herndon C, Foreyt WJ, et al. Survival of  
479 bighorn sheep (*Ovis canadensis*) commingled with domestic sheep (*Ovis aries*) in the absence of  
480 *Mycoplasma ovipneumoniae*. *J Wildl Dis.* 2012;48(1):168-72. doi: 10.7589/0090-3558-48.1.168.
- 481 7. Lawrence PK. Transmission of *Mannheimia haemolytica* from domestic sheep (*Ovis aries*) to  
482 bighorn sheep (*Ovis canadensis*): Unequivocal demonstration with green fluorescent protein-  
483 tagged organisms. *J Wildlife Dis.* 2010;46(3):706-17. doi: 10.7589/0090-3558-46.3.706.  
484 Correction: 2010;46(4):1346-7. doi: 10.7589/0090-3558-46.4.1346.
- 485 8. Alley MR. Effects of pneumonia on lamb production. *Proceedings of the Society of Sheep and*  
486 *Beef Cattle Veterinarians of the New Zealand Veterinary Association.* 1987. p. 163-70.



- 487 9. Besser TE, Levy J, Ackerman M, Nelson D, Manlove K, Potter KA, et al. A pilot study of the  
488 effects of *Mycoplasma ovipneumoniae* exposure on domestic lamb growth and performance.  
489 PLoS One. 2019;14(2):e0207420. doi: 10.1371/journal.pone.0207420.
- 490 10. Butler CJ, Edwards WH, Paterson JT, Proffitt KM, Jennings-Gaines JE, Killion HJ, et al.  
491 Respiratory pathogens and their association with population performance in Montana and  
492 Wyoming bighorn sheep populations. PLoS One. 2018;13(11):e0207780. doi:  
493 10.1371/journal.pone.0207780.
- 494 11. Besser TE, Cassirer EF, Potter KA, VanderSchalie J, Fischer A, Knowles DP, et al.  
495 Association of *Mycoplasma ovipneumoniae* infection with population-limiting respiratory  
496 disease in free-ranging Rocky Mountain bighorn sheep (*Ovis canadensis canadensis*). J Clin  
497 Microbiol. 2008;46(2):423-30. doi: 10.1128/JCM.01931-07.
- 498 12. Niang M, Rosenbusch RF, DeBey MC, Niyo Y, Andrews JJ, Kaeberle ML. Field isolates of  
499 *Mycoplasma ovipneumoniae* exhibit distinct cytopathic effects in ovine tracheal organ cultures.  
500 Zentralbl Veterinarmed A. 1998;45(1):29-40. doi: 10.1111/j01439-0442.1998.tb00798.x.
- 501 13. Niang M, Rosenbusch RF, Andrews JJ, Kaeberle ML. Demonstration of a capsule on  
502 *Mycoplasma ovipneumoniae*. Am J Vet Res. 1998;59(5):557-62. PubMed PMID: 9582956.
- 503 14. Li Y, Jiang Z, Xue D, Deng G, Li M, Liu X, et al. *Mycoplasma ovipneumoniae* induces sheep  
504 airway epithelial cell apoptosis through an ERK signalling-mediated mitochondria pathway.  
505 BMC Microbiol. 2016;16(1):222. doi: 10.1186/s12866-016-0842-0.
- 506 15. Jones GE, Keir WA, Gilmour JS. The pathogenicity of *Mycoplasma ovipneumoniae* and  
507 *Mycoplasma arginini* in ovine and caprine tracheal organ cultures. J Comp Pathol.  
508 1985;95(4):477-87. doi: 10.1016/0021-9975(85)90018-0.

- 509 16. Al-Kaissi A, Alley MR. Electron microscopic studies of the interaction between ovine  
510 alveolar macrophages and *Mycoplasma ovipneumoniae* *in vitro*. *Vet Microbiol.* 1983;8(6):571-  
511 84. doi: 10.1016/0378-1135(83)90006-8.
- 512 17. Niang M, Rosenbusch RF, Lopez-Virella J, Kaeberle ML. Expression of functions by normal  
513 sheep alveolar macrophages and their alteration by interaction with *Mycoplasma ovipneumoniae*.  
514 *Vet Microbiol.* 1997;58(1):31-43. doi: 10.1016/S0378-1135(97)00141-7.
- 515 18. Shanthalingam S, Narayanan S, Batra SA, Jegarubee B, Srikumaran S. *Fusobacterium*  
516 *necrophorum* in North American bighorn sheep (*Ovis canadensis*) pneumonia. *J Wildl Dis.*  
517 2016;52(3):616-20. doi: 10.7589/2015-02-039..
- 518 19. Ye Q, Xu XJ, Shao WX, Pan YX, Chen XJ. *Mycoplasma pneumoniae* infection in children is  
519 a risk factor for developing allergic diseases. *ScientificWorldJournal.* 2014;2014:986527. doi:  
520 10.1155/2014/986527.
- 521 20. Dobbs NA, Odeh AN, Sun X, Simecka JW. The Multifaceted role of T cell-mediated  
522 immunity in pathogenesis and resistance to mycoplasma respiratory disease. *Curr Trends*  
523 *Immunol.* 2009;10:1-19. PubMed PMID: 21743780.
- 524 21. Fry LM, Schneider DA, Frevert CW, Nelson DD, Morrison WI, Knowles DP. East Coast  
525 Fever caused by *Theileria parva* is characterized by macrophage activation associated with  
526 vasculitis and respiratory failure. *PLoS One.* 2016;11(5):e0156004. doi:  
527 10.1371/journal.pone.0156004.
- 528 22. Khosravi AR, Alheidary S, Nikaein D, Asghari N. *Aspergillus fumigatus* conidia stimulate  
529 lung epithelial cells (TC-1 JHU-1) to produce IL-12, IFN $\gamma$ , IL-13 and IL-17 cytokines:  
530 Modulatory effect of propolis extract. *J Mycol Med.* 2018;28(4):594-8. doi:  
531 10.1016/j.mycmed.2018.09.006.

- 532 23. Zurlo J, Rudacille D, Goldberg AM. The three Rs: The way forward. *Environ Health*  
533 *Perspect.* 1996;104(8):878-80. doi: 10.1289/ehp.96104878.
- 534 24. Buechler C, Ritter M, Orso E, Langmann T, Klucken J, Schmitz G. Regulation of scavenger  
535 receptor CD163 expression in human monocytes and macrophages by pro- and antiinflammatory  
536 stimuli. *J Leukoc Biol.* 2000;67(1):97-103. doi: 10.1002/jlb.67.1.97.
- 537 25. Murphy K, Weaver C. *Janeway's Immunobiology.* 9th ed. New York: Garland Science; 2017.
- 538 26. Song X, He X, Li X, Qian Y. The roles and functional mechanisms of interleukin-17 family  
539 cytokines in mucosal immunity. *Cell Mol Immunol.* 2016;13(4):418-31. doi:  
540 10.1038/cmi.2015.105.
- 541 27. Herndon CN, Foreyt WJ, Srikumaran S. Differential expression of interleukin-8 by  
542 polymorphonuclear leukocytes of two closely related species, *Ovis canadensis* and *Ovis aries*, in  
543 response to *Mannheimia haemolytica* infection. *Infect Immun.* 2010;78(8):3578-84. doi:  
544 10.1128/IAI.00327-10.
- 545 28. Silflow RM, Foreyt WJ, Leid RW. *Pasteurella haemolytica* cytotoxin-dependent killing of  
546 neutrophils from bighorn and domestic sheep. *J Wildl Dis.* 1993;29(1):30-5. doi: 10.7589/0090-  
547 3558-29.1.30.
- 548 29. Highland MA. Comparative investigation of the immune systems of two ovine species (*Ovis*  
549 *aries* and *Ovis canadensis*). Ph.D. Thesis, Washington State University. 2016. Available from:  
550 <https://research.libraries.wsu.edu/xmlui/handle/2376/35/discover>.
- 551 30. Chu HW, Jeyaseelan S, Rino JG, Voelker DR, Wexler RB, Campbell K, et al. TLR2  
552 signaling is critical for *Mycoplasma pneumoniae*-induced airway mucin expression. *J Immunol.*  
553 2005;174(9):5713-9. doi: 10.4049/jimmunol.174.9.5713.
- 554

555 **S1 Table. Antibodies screened for immunolabeling formalin-fixed, paraffin-embedded**  
556 **tissue from domestic sheep and bighorn sheep.**

557

558 **S2 Table. Measures of lung tissue thin section area by study subject.** Bighorn sheep lambs  
559 are highlight green. Outliers are bolded with an asterisk in the sheep ID column. Species:  
560 domestic sheep, DS; *Mycoplasma ovipneumoniae* infection status: not detected, ND; detected,  
561 POS.

562

563 **S3 Table. Measures of proportional chromogen deposition area within thin section by study**  
564 **subject.** Bighorn sheep lambs are highlight green. Outliers are bolded with an asterisk in the  
565 sheep ID column. Region of interest, ROI; species: domestic sheep, DS; bighorn sheep, BHS;  
566 *Mycoplasma ovipneumoniae* infection status: not detected, ND; detected, POS.

567

568 **S1 Fig. Tissue region of interest selection for analysis using Visiopharm software.** (A)  
569 Bronchiolar region selection (encircled by blue dashed line). (B) Alveolar regions selected by  
570 deselection of bronchiolar regions (encircled by black dash lines) from total lung tissue area  
571 (encircled blue dashed line); lymph node present on slide is excluded from selection. (C)  
572 Original scanned image zoomed in on alveolar spaces. (D) Red marks summed = positively  
573 stained area; green highlighted tissue = area counterstained. Ratio of immunolabeled area = Red  
574  $\div$  (Red + Green).

575

576 **S2 Fig. CD79a immunohistochemical staining in bighorn sheep tissues.** Higher magnification  
577 of anti-CD79a antibody immunolabeled (A) bighorn sheep lymph node used for antibody

578 optimization and validation, and (B) bronchus-associated lymphoid tissue from one of the  
579 bighorn sheep in this study.

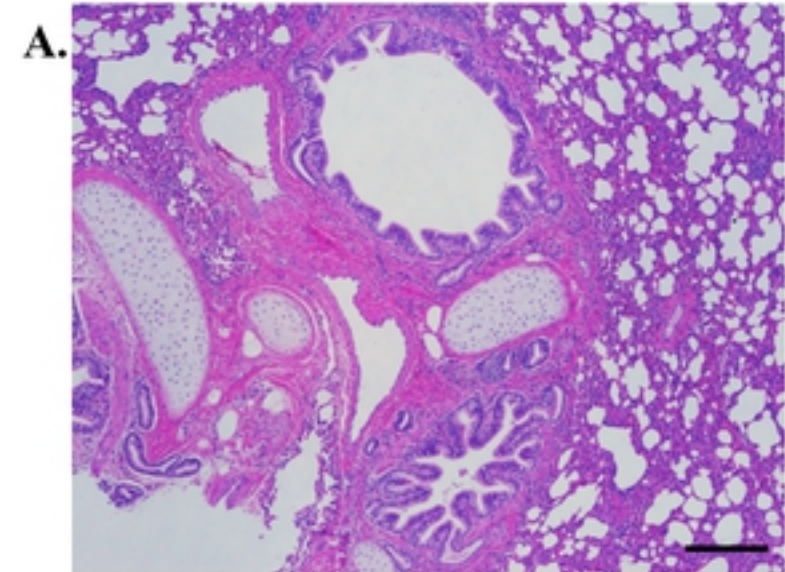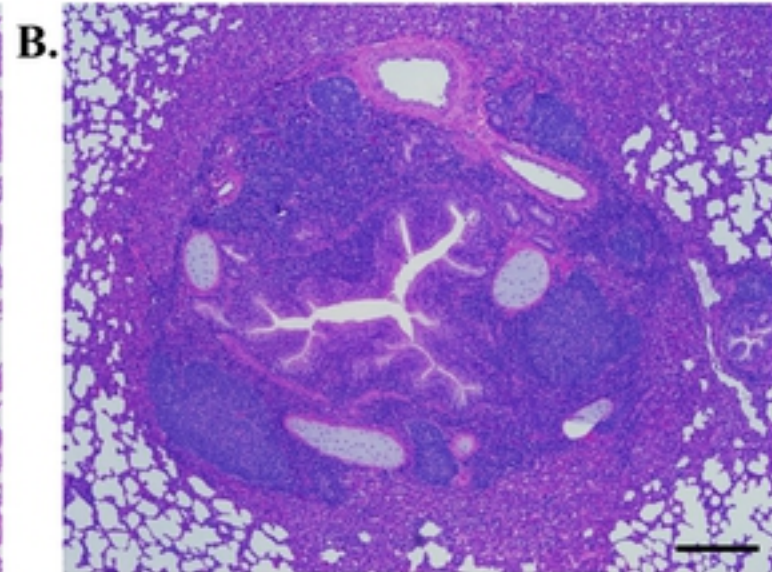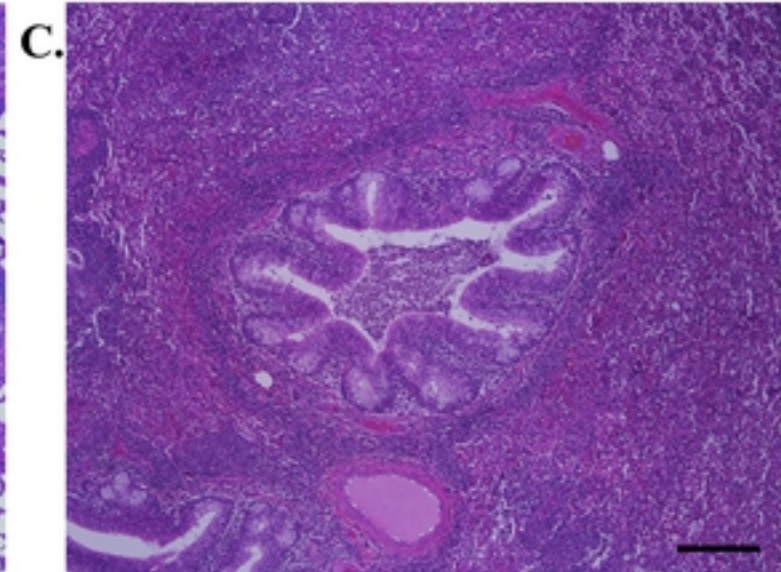

Figure

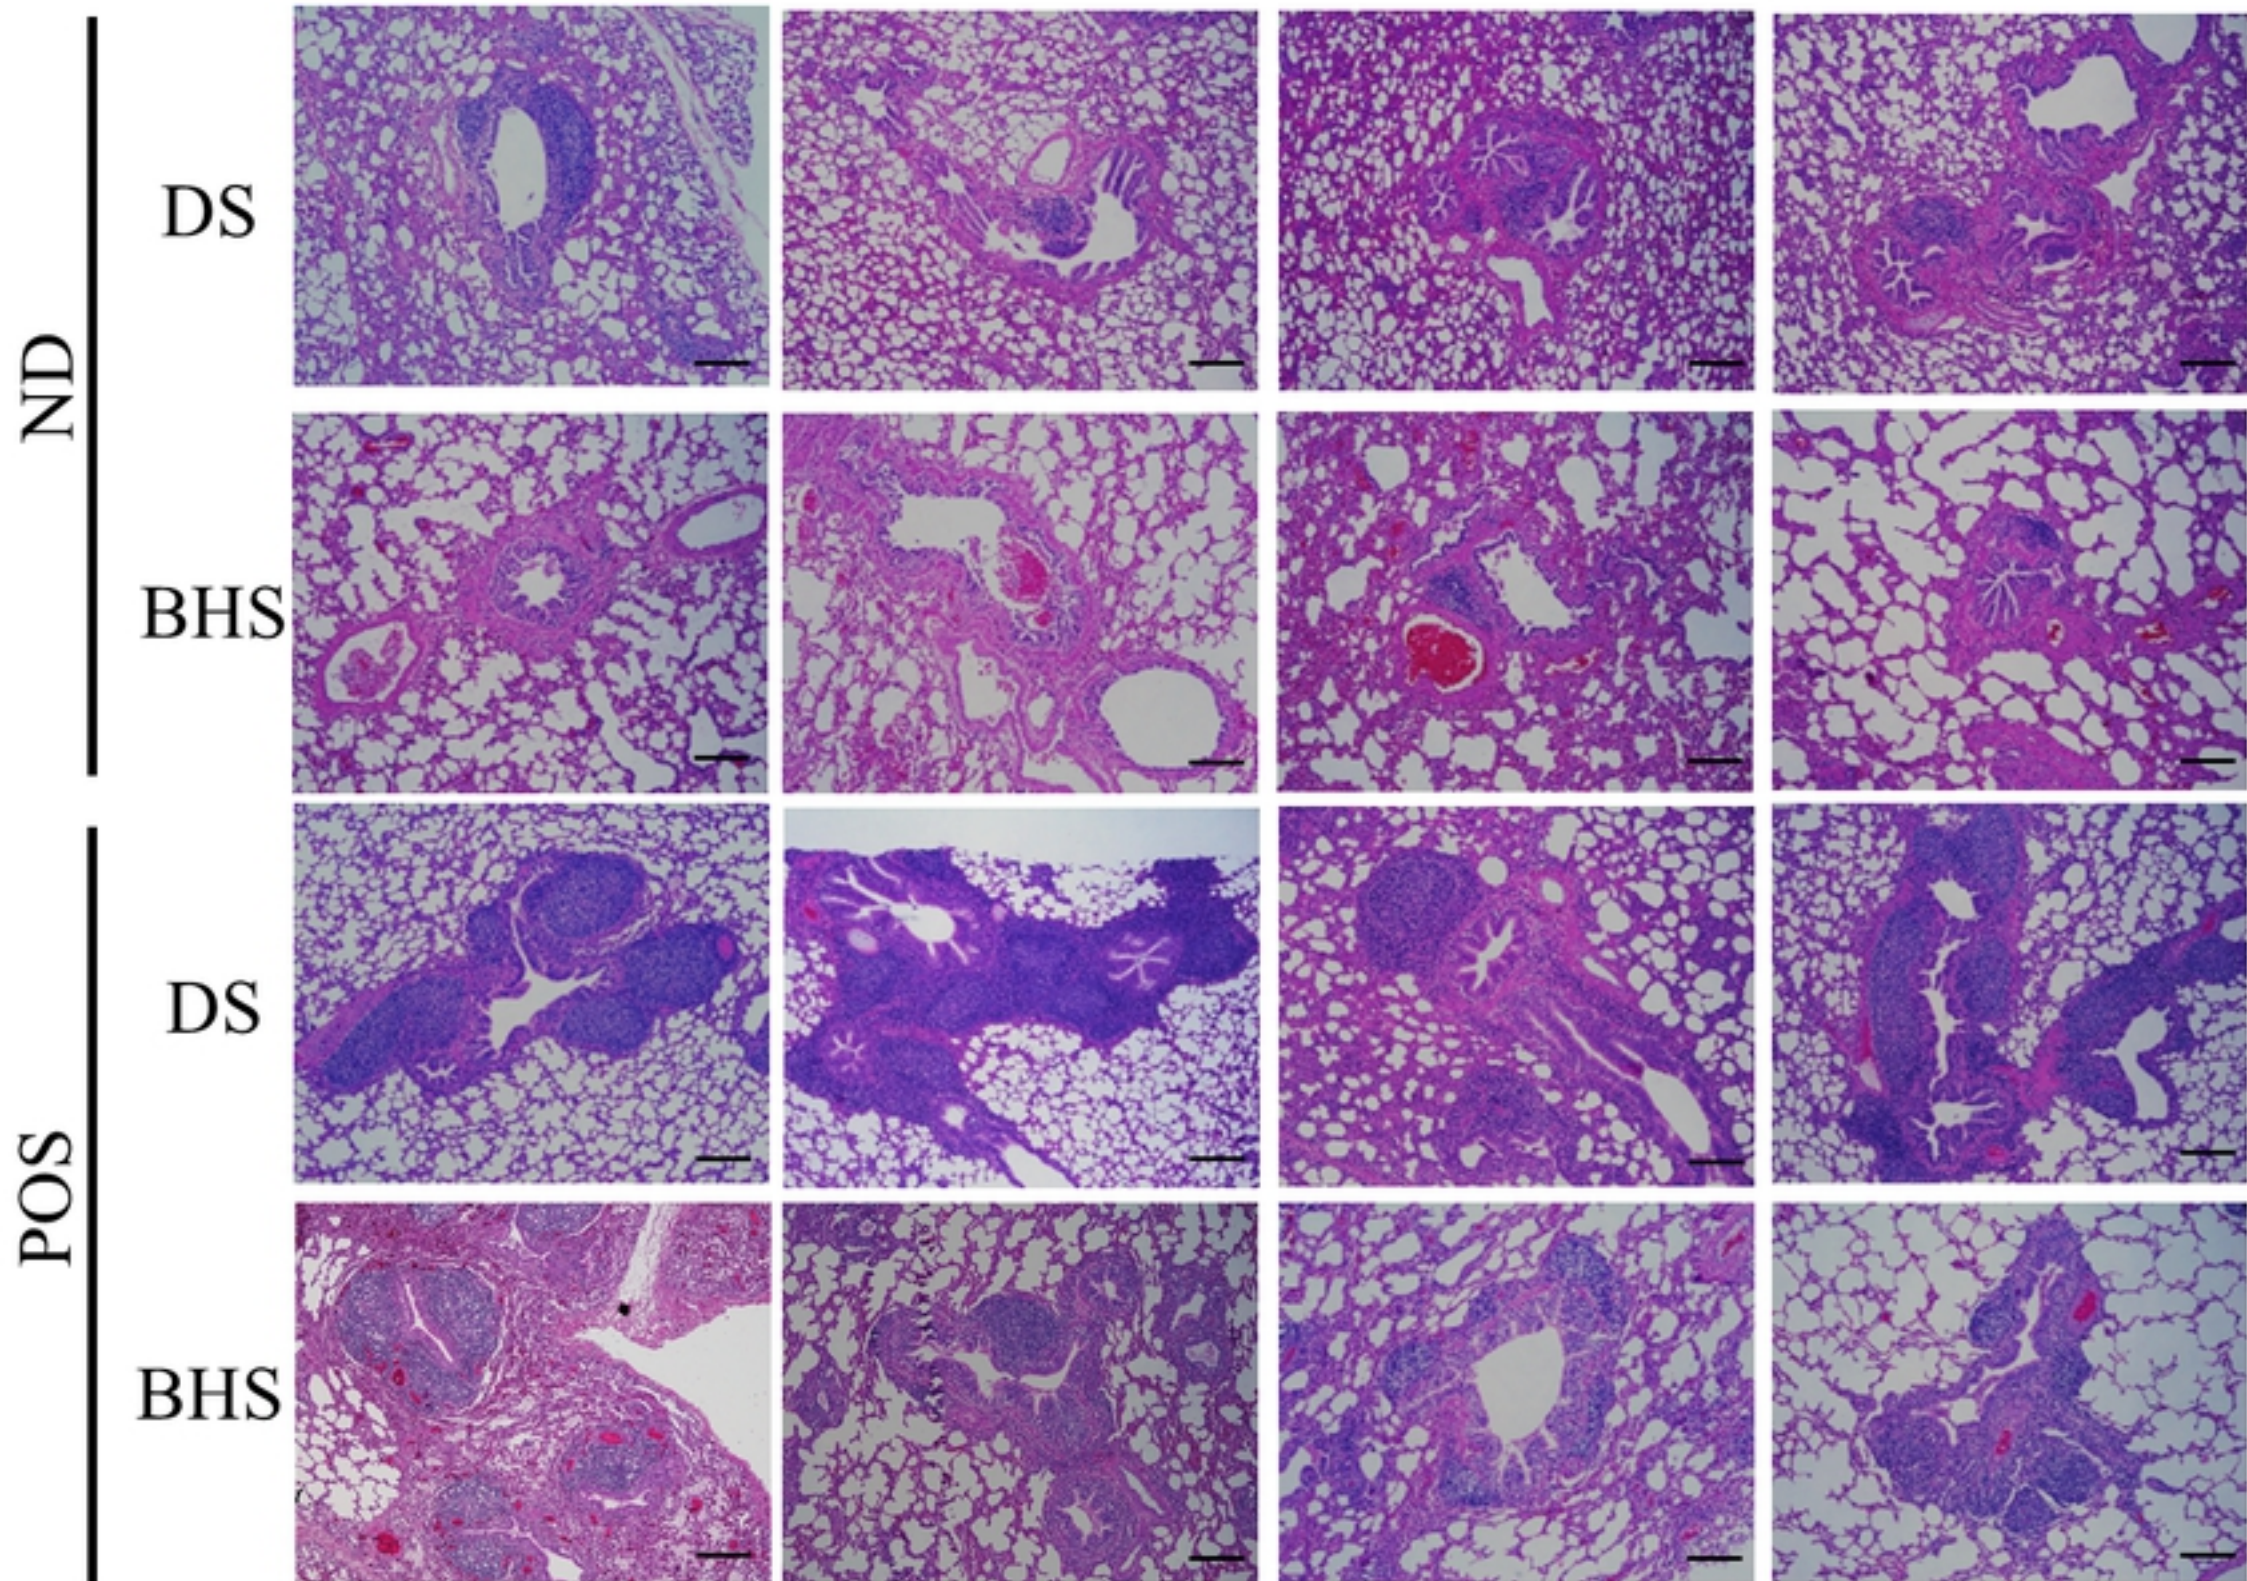

Figure

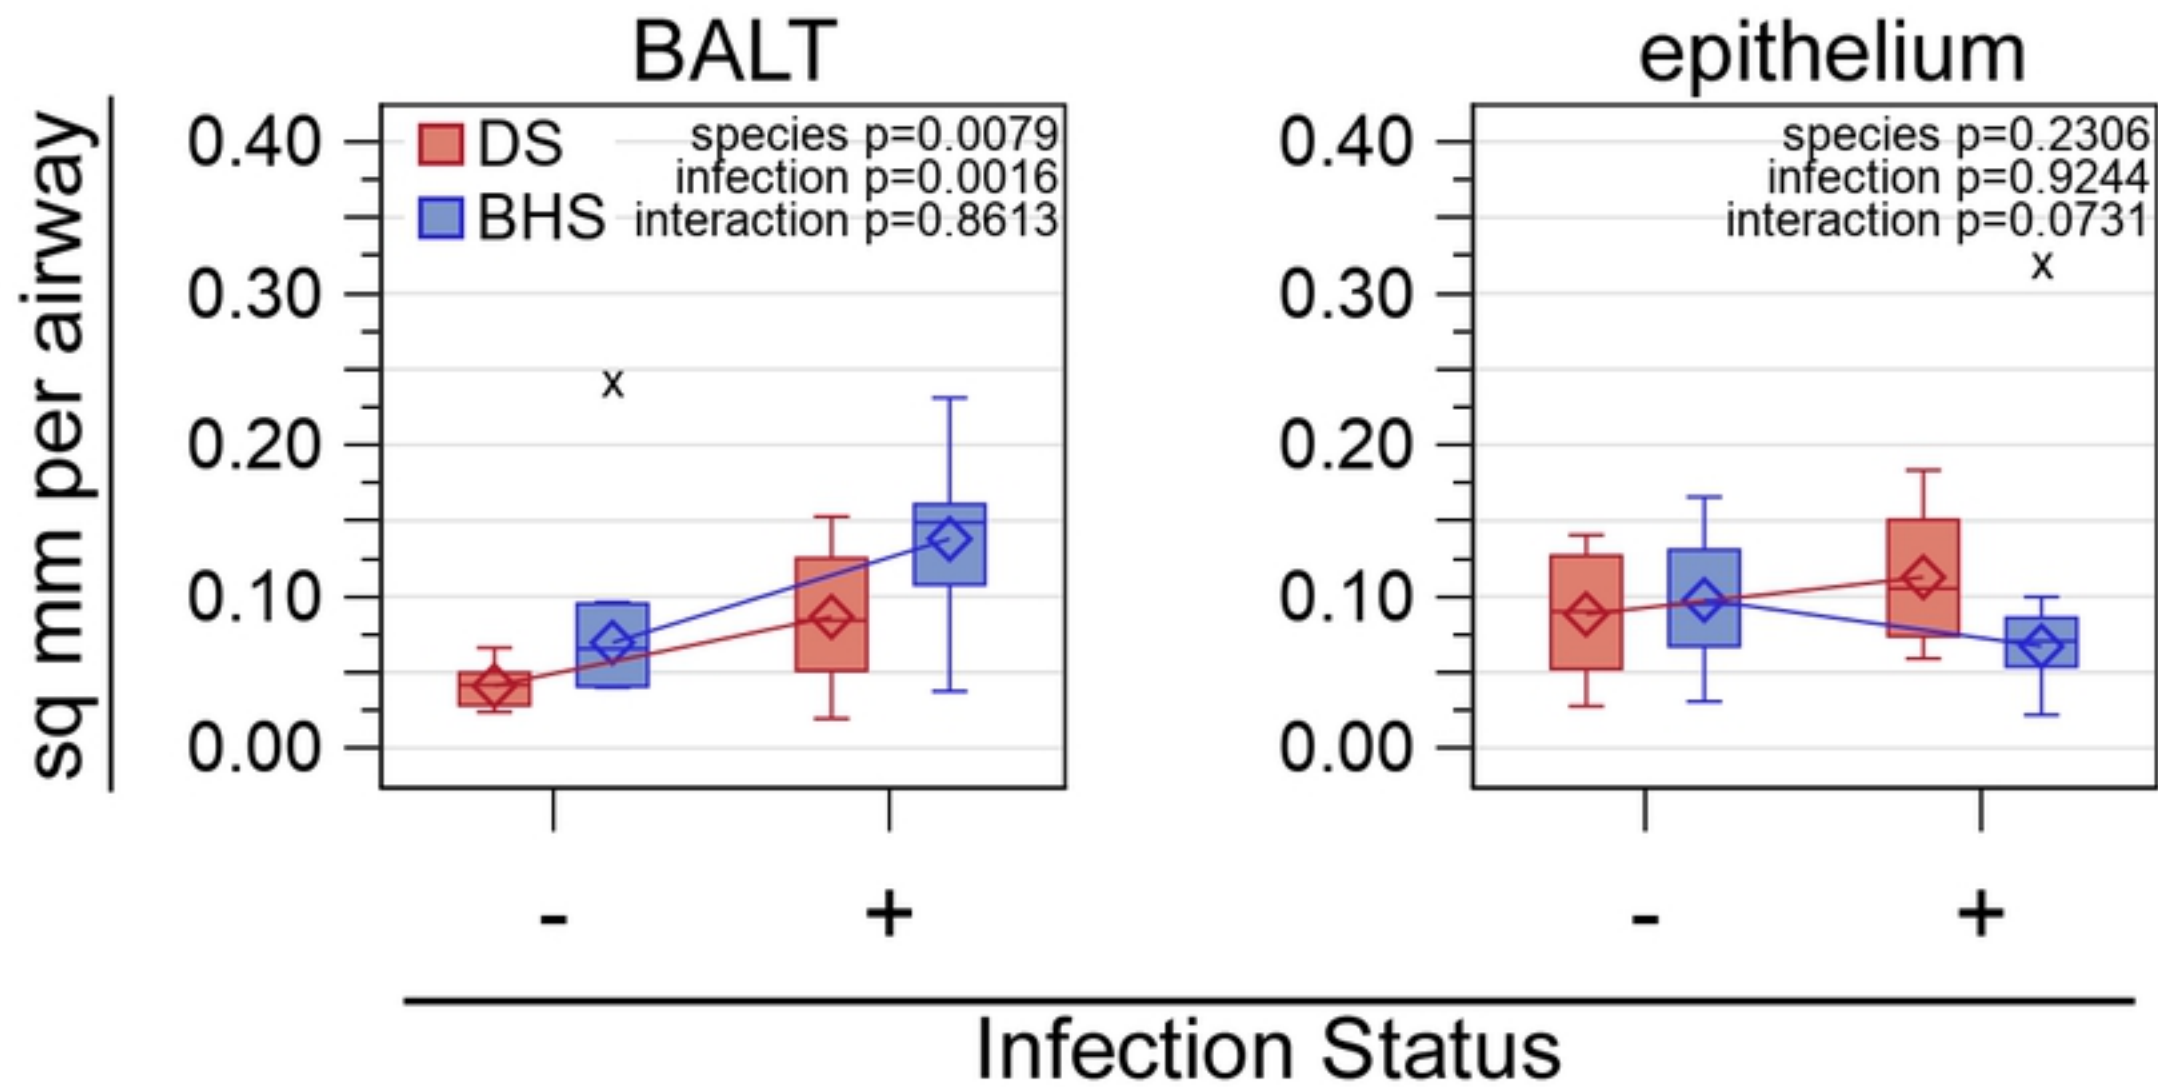

Figure



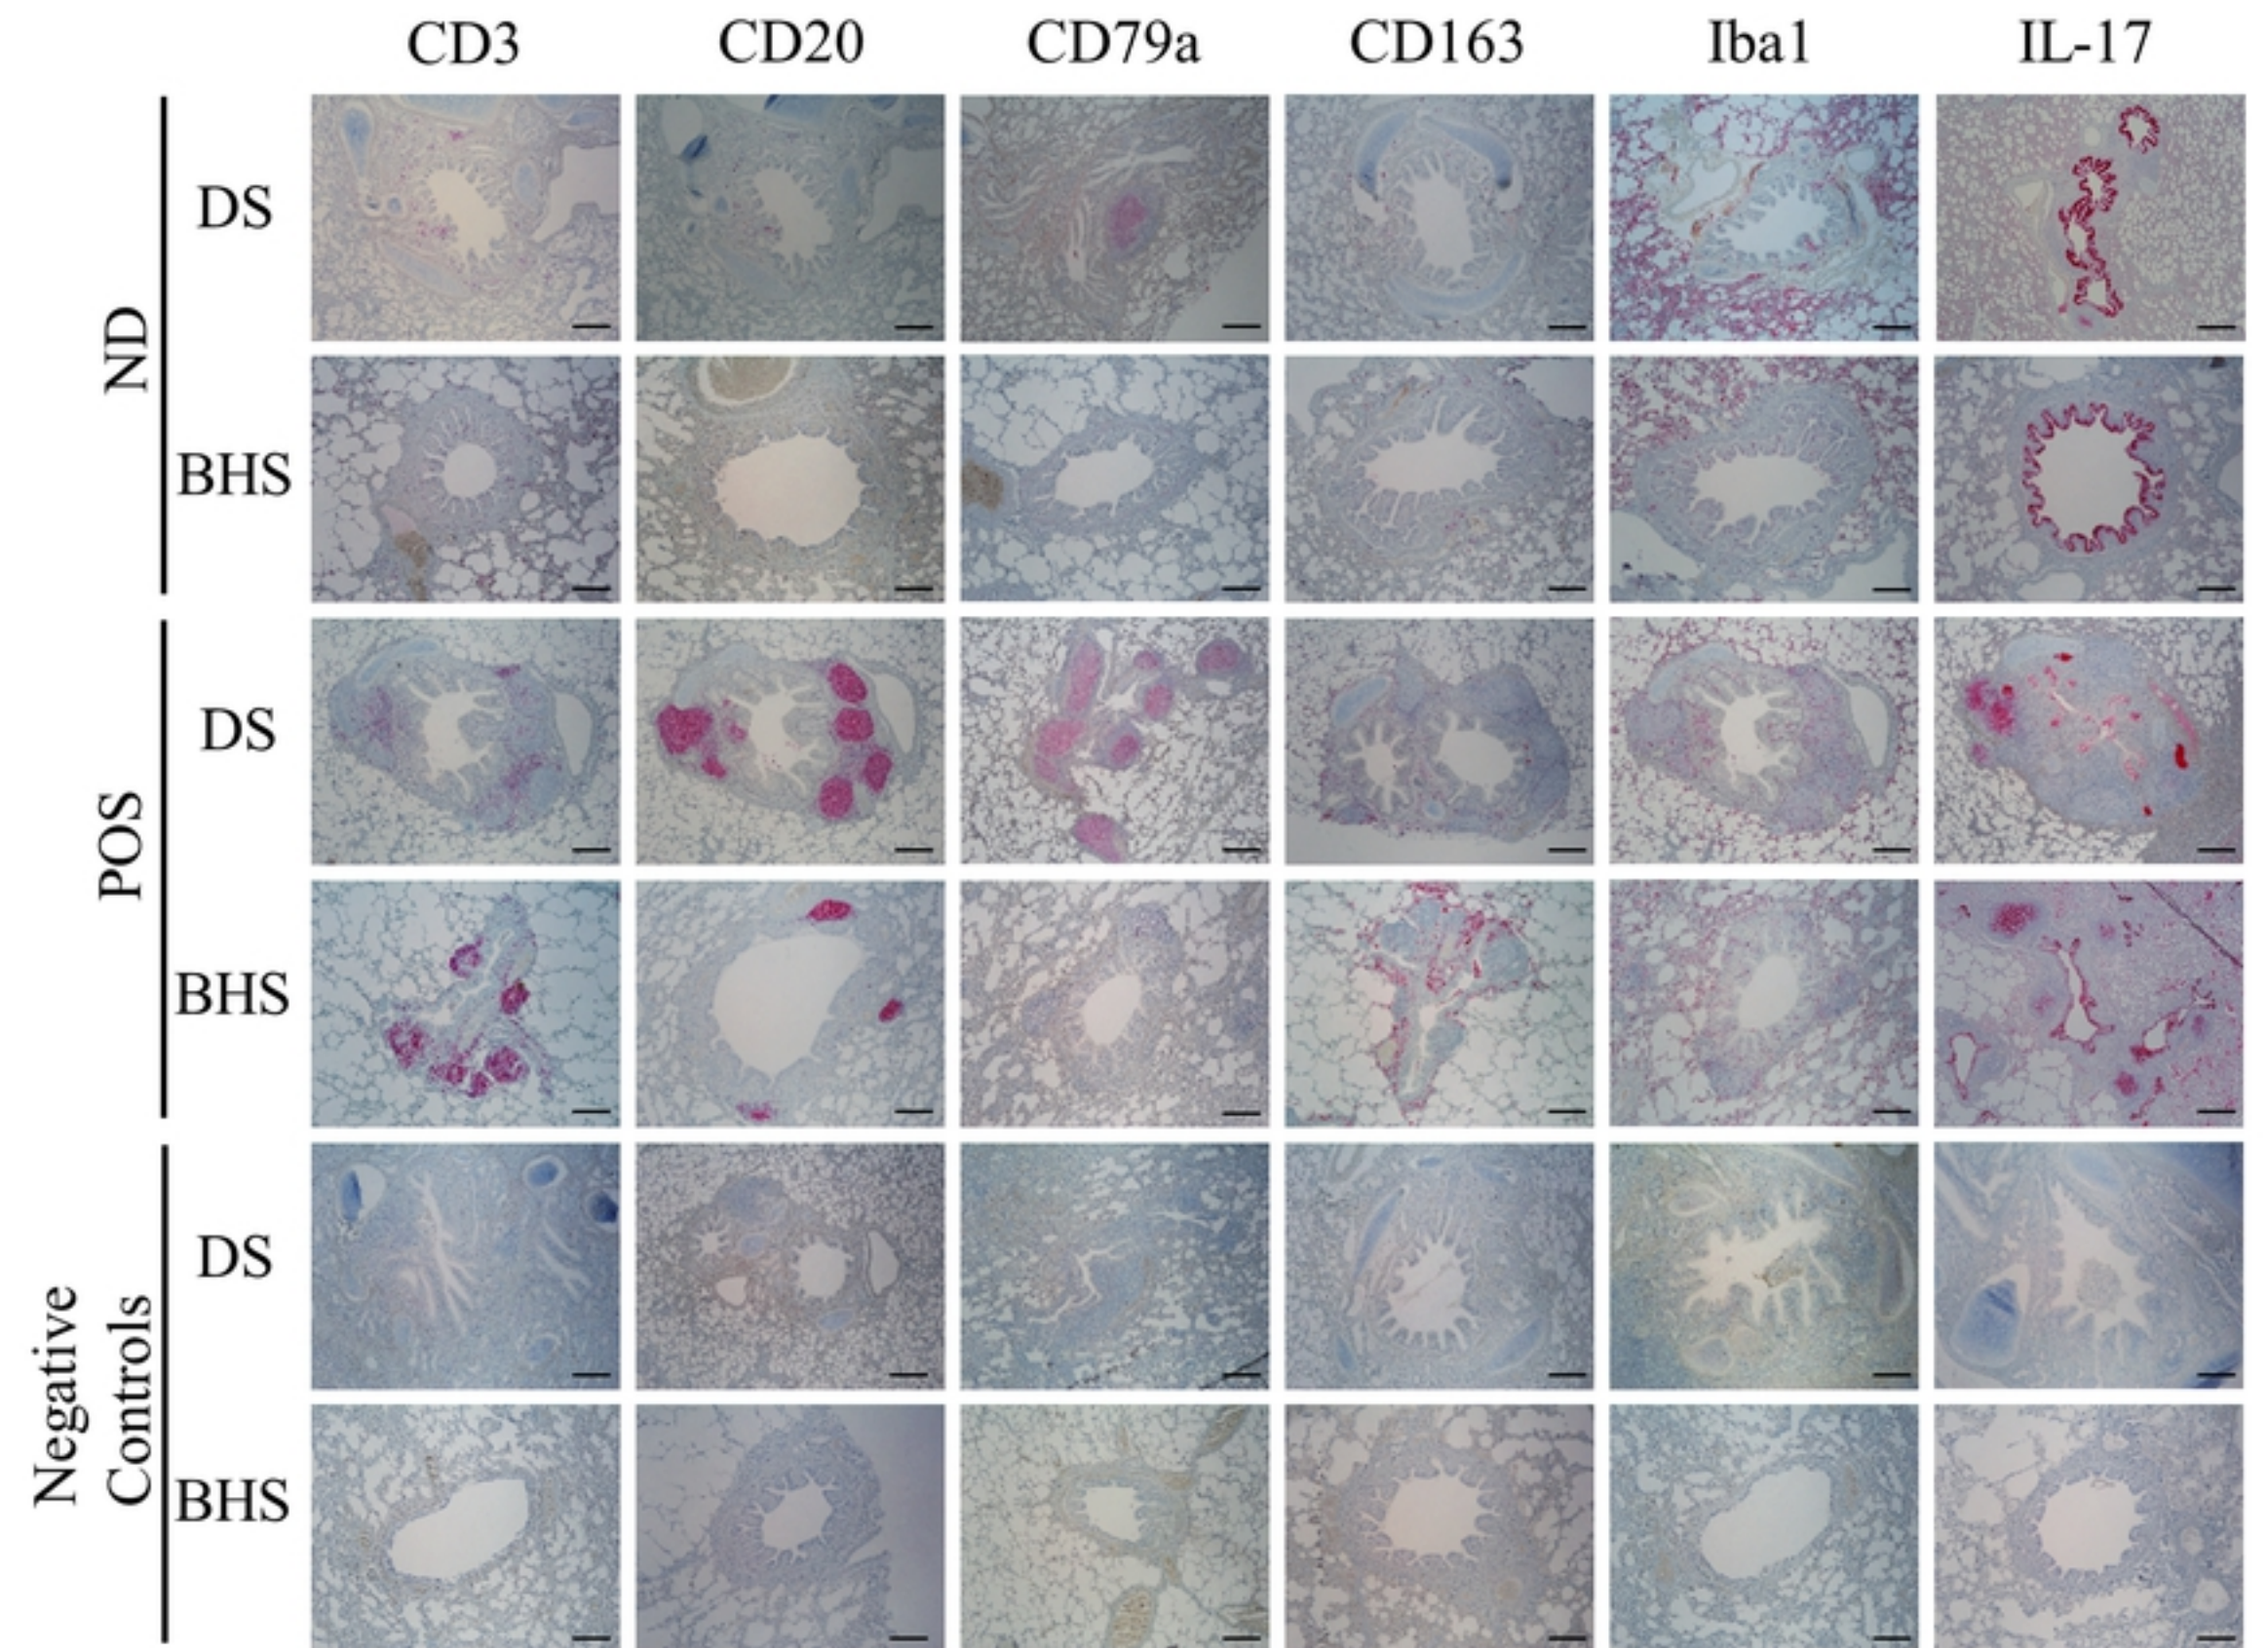

Figure

**A**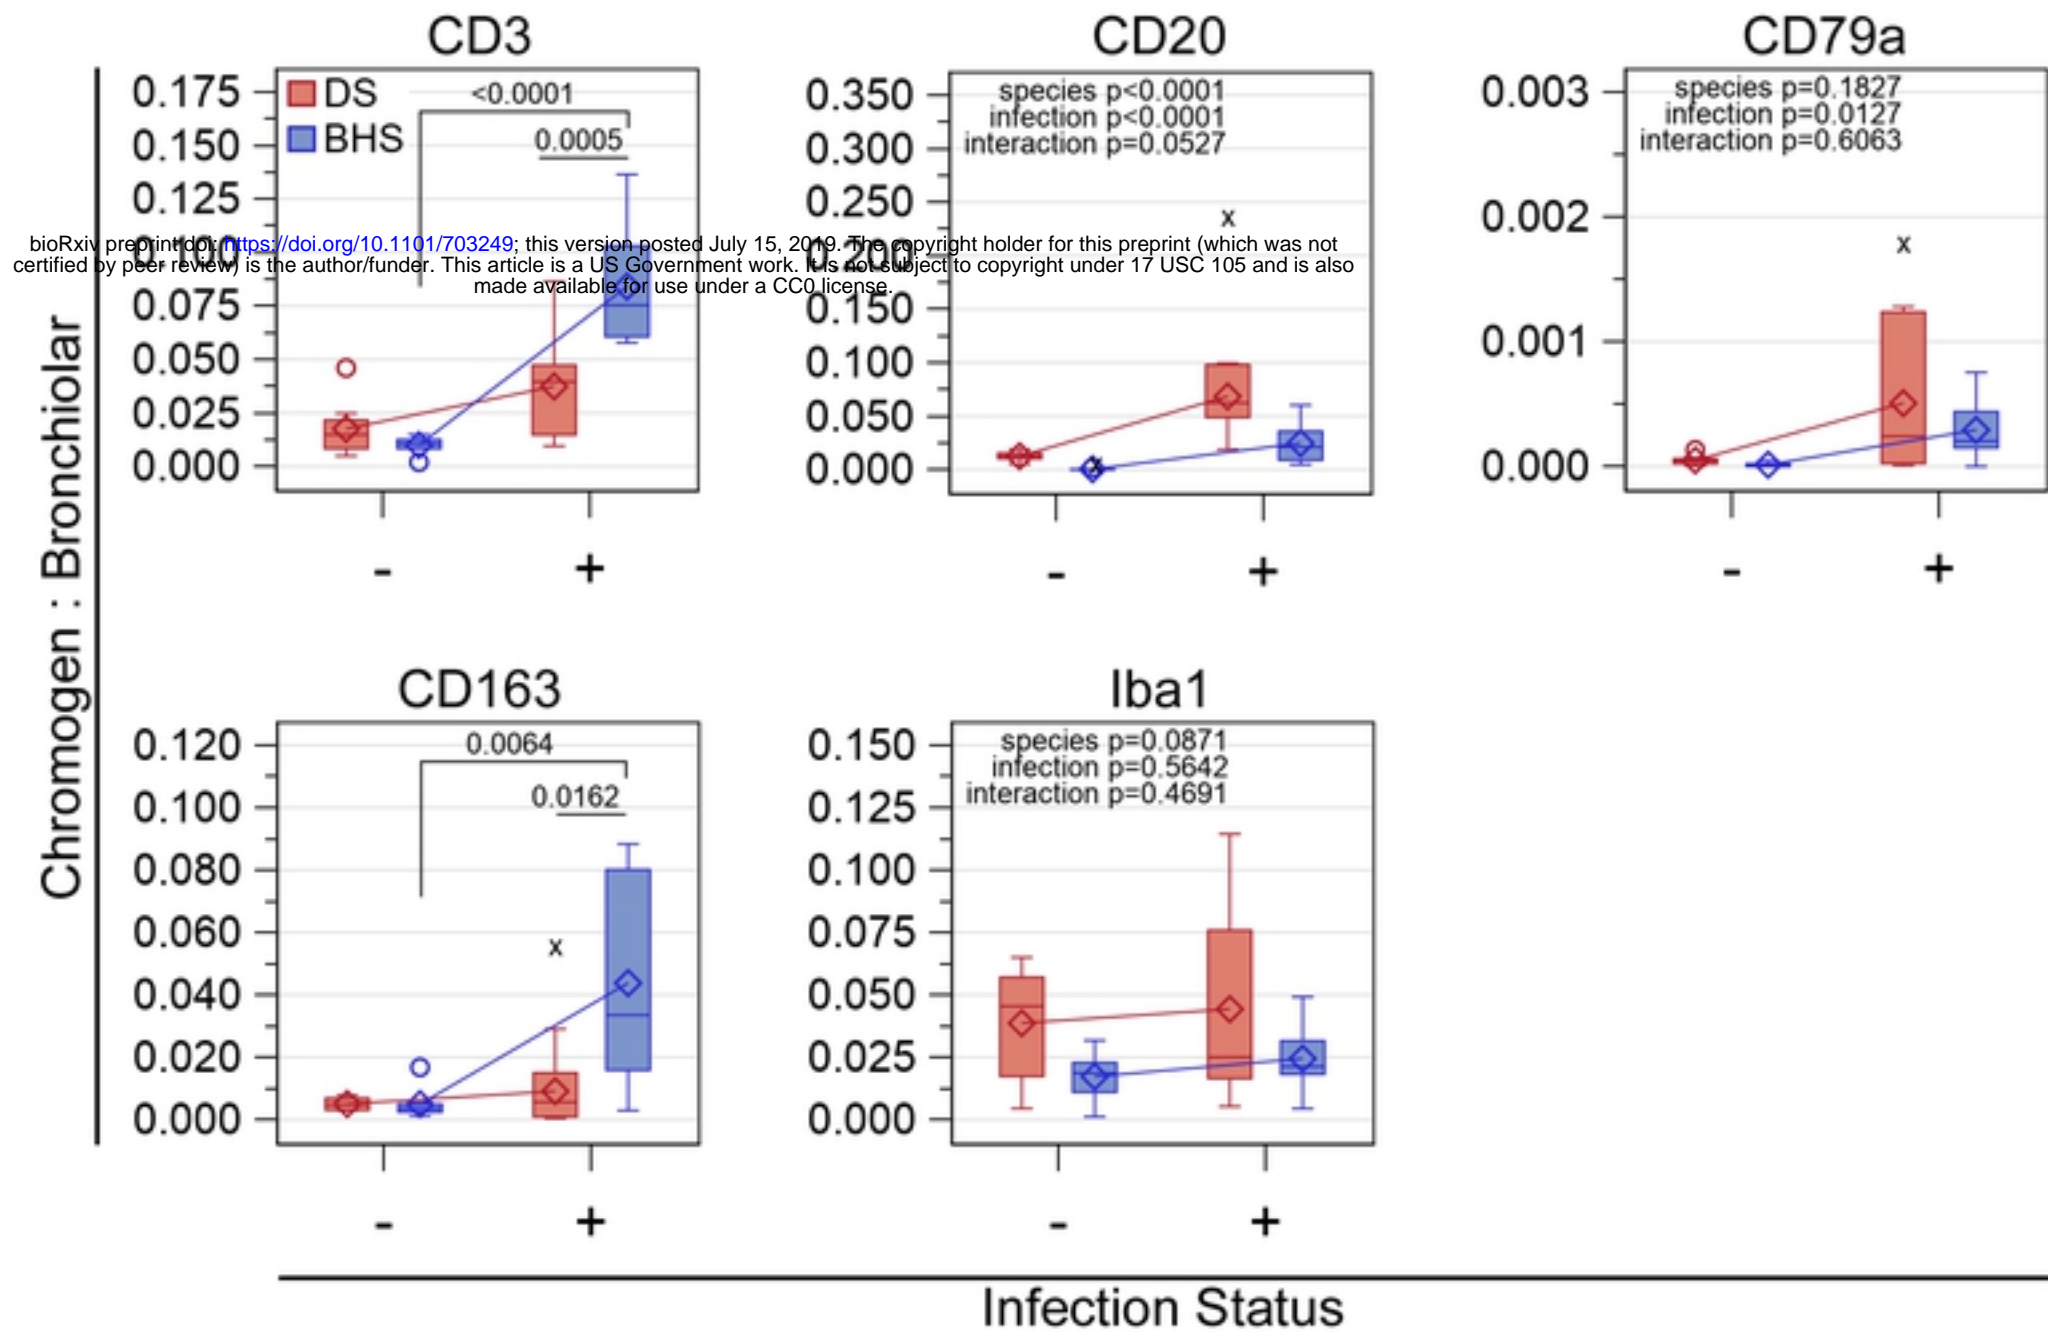**B**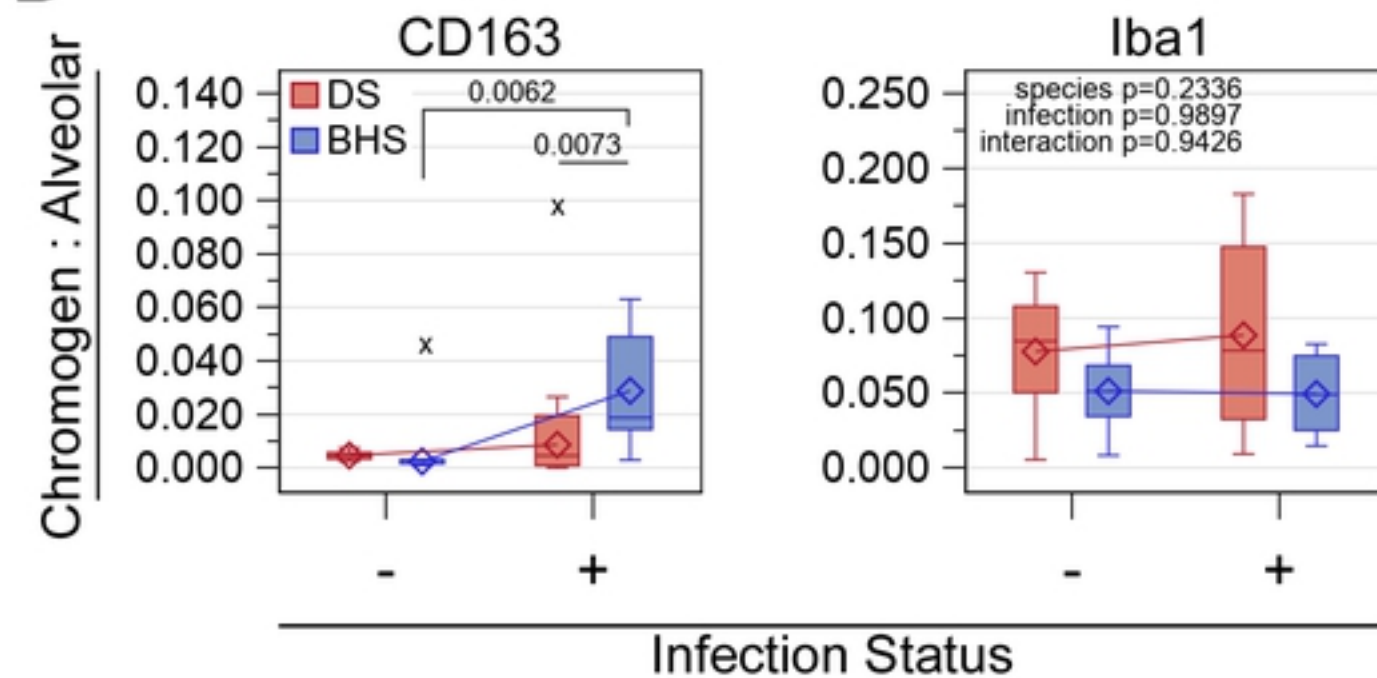

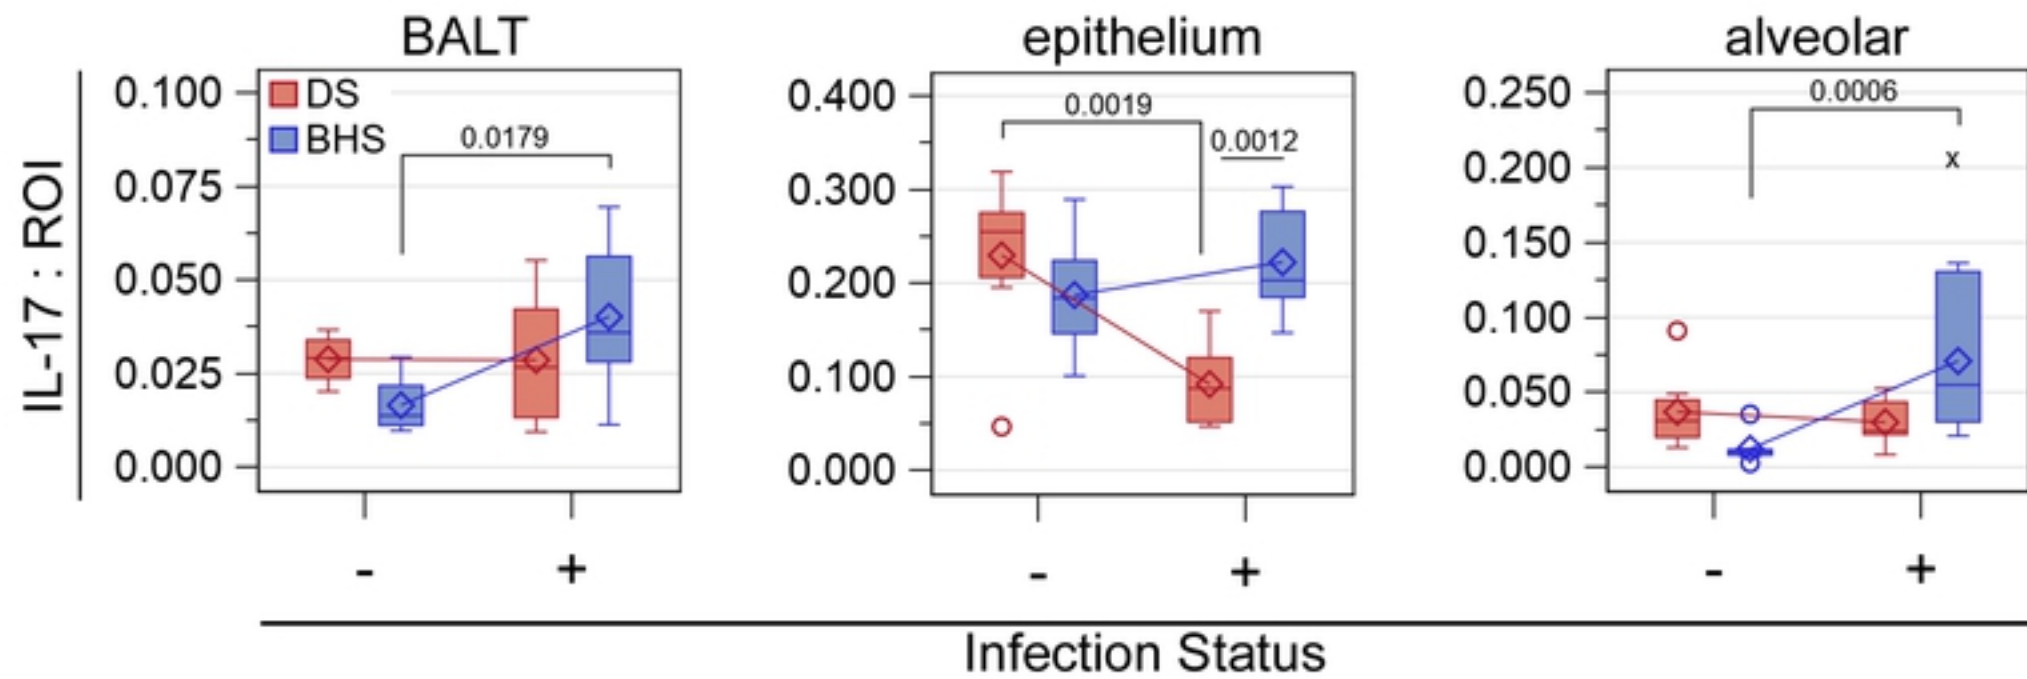

Figure
